# Supplementary material for: The composite electrode of LiFePO4 cathode materials modified with exfoliated graphene from expanded graphite for high power Li-ion batteries
Source: Royal Society of Chemistry journal article supplement (doi:10.1039/c3ta14713d), 2013-11-27
Supplement: c3ta14713d.pdf [file c3ta14713d.pdf]

## Electronic Supplementary Information

MG-IPA sample:

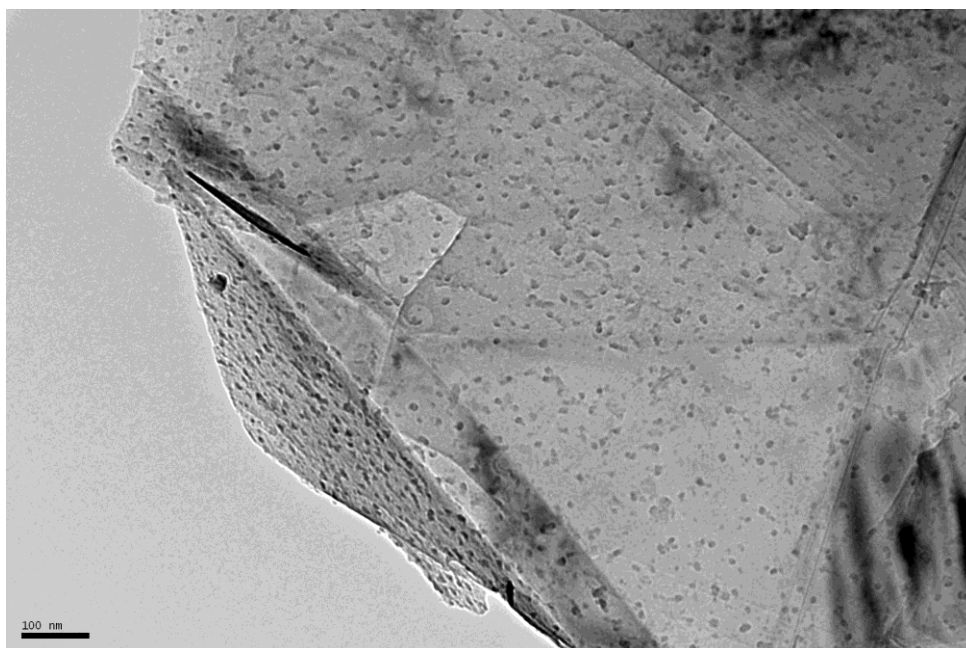

**Fig. S1.** TEM of MG-IPA sample.

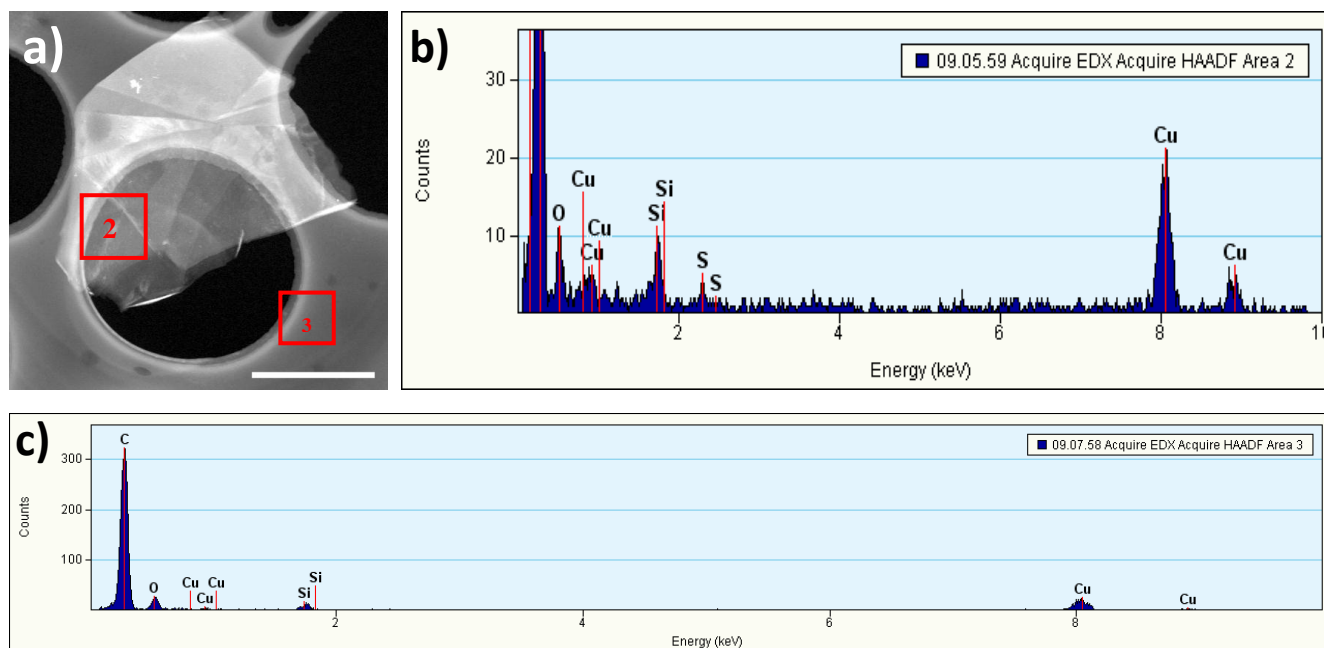

**Fig. S2.** EDX analysis of MG-IPA sample: Image a) is the TEM image of MG-IPA sample, the white bar is 2 $\mu$ m; Image b) is the element analysis of selected rectangular red area of MG-IPA, which is denoted as No.2; Image c) is the element analysis of selected rectangular red area of TEM grid, which is denoted as No.3.

MG-HNO<sub>3</sub> sample:

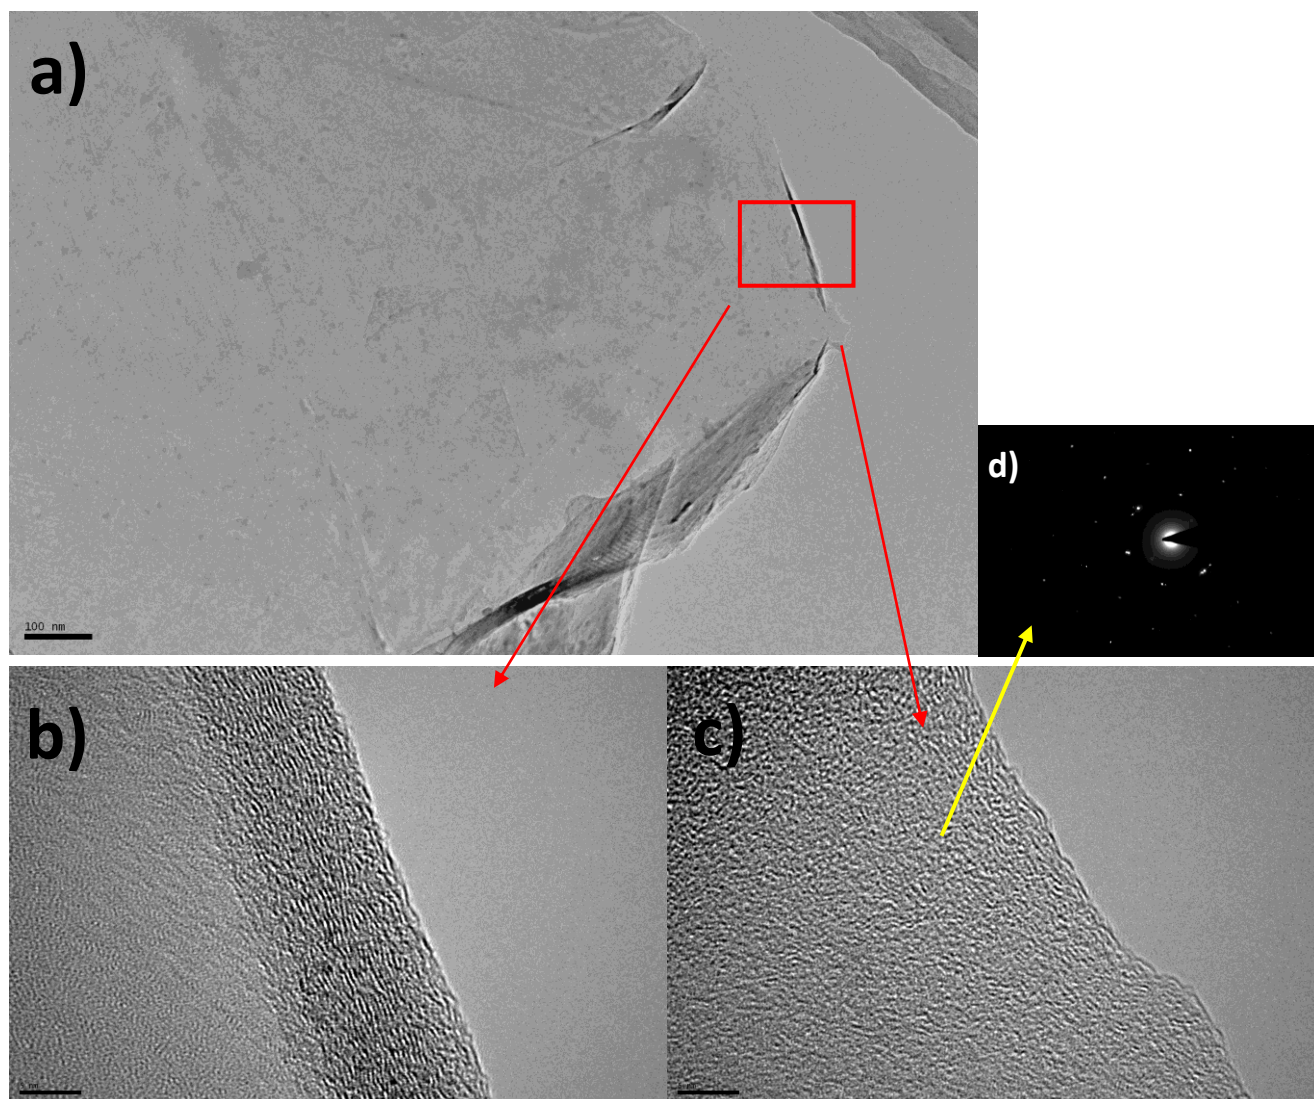

**Fig. S3** TEM of MG-HNO<sub>3</sub> sample (a-c) and the electron diffraction pattern of the graphene edge (d).  
The black bar of image b and c is 5 nm.

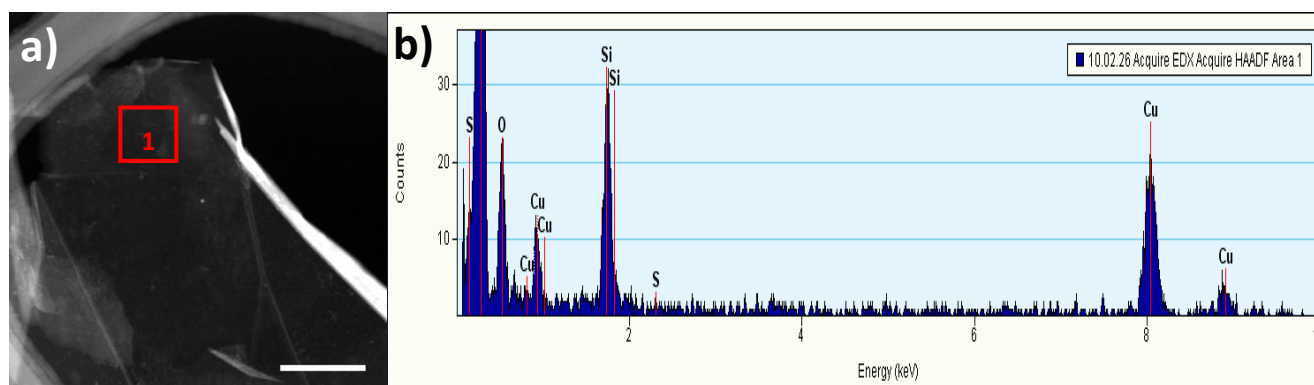

**Fig. S4.** EDX analysis of MG-HNO<sub>3</sub> sample: Image a) is the TEM image of MG-HNO<sub>3</sub> sample, the white bar is 500 nm; Image b) is the element analysis of selected rectangular red area of MG-HNO<sub>3</sub>.

## Carbon nanotube (CNT) sample

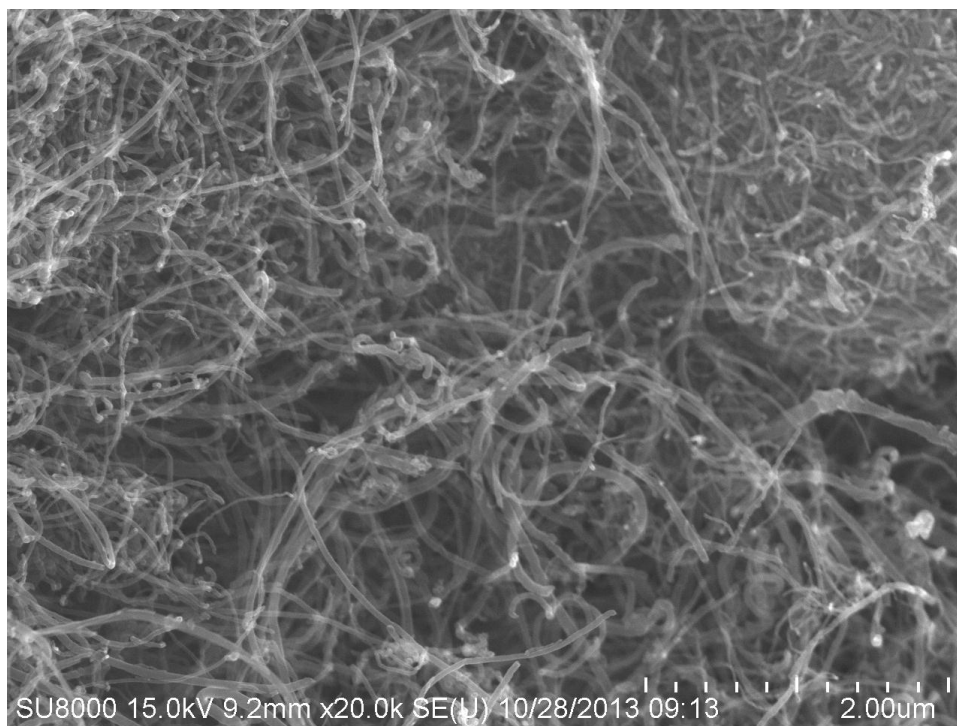

**Fig. S5** SEM of CNT sample
